# Supplementary material for: DNA copy number analysis of metastatic urothelial carcinoma with comparison to primary tumors
Source: PubMed Central journal article supplement (PMC4392457; doi:10.1186/s12885-015-1192-2), 2015-04-09
Supplement: 12885_2015_1192_MOESM1_ESM.pdf [file 12885_2015_1192_MOESM1_ESM.pdf]

| Patient ID | Gender | Age | Primary sample | Histology                                      | Primary T stage | Metastatic sample | Normal control   |
|------------|--------|-----|----------------|------------------------------------------------|-----------------|-------------------|------------------|
| 5          | Female | 52  | Bladder        | High grade UC (micropapillary differentiation) | T3              | Lung              | Pelvic node      |
| 19*        | Male   | 75  | Bladder        | High grade UC                                  | T3              | Pelvic node       | Pelvic node      |
| 25*        | Female | 72  | Bladder        | High grade UC                                  | T3              | Kidney            | Pelvic node      |
| 41*        | Male   | 61  | Bladder        | High grade UC (squamous differentiation)       | T3              | Peritoneum        | Pelvic node      |
| 63         | Female | 52  | Bladder        | High grade UC                                  | T4              | Pelvic node       | Pelvic node      |
| 160*       | Male   | 72  | Bladder        | High grade UC                                  | T3              | Lung              | Seminal vesicle  |
| 169*       | Female | 58  | Ureter         | High grade UC                                  | T3              | Pelvic mass       | Pelvic node      |
| 186*       | Female | 64  | Ureter         | High grade UC                                  | T1              | Lung              | Kidney           |
| 206*       | Male   | 48  | Bladder        | UC carcinoma in situ                           | Tis             | Pelvic node       | Pelvic node      |
| 231*       | Female | 51  | Ureter         | High grade UC                                  | T3              | Brain x 2         | Kidney           |
| 240*       | Male   | 70  | Ureter         | High grade UC                                  | T2              | Lung              | Kidney           |
| 10         | Male   | 54  | Bladder        | High grade UC                                  | T2              |                   |                  |
| 29         | Male   | 65  | Bladder        | High grade UC                                  | T3              |                   | Pelvic node      |
| 31         | Male   | 61  | Bladder        | High grade UC                                  | T3              |                   | Pelvic node      |
| 34         | Male   | 69  | Bladder        | High grade UC                                  | T3              |                   | Pelvic node      |
| 60         | Female | 35  | Bladder        | High grade UC                                  | T1              |                   | Pelvic node      |
| 62         | Male   | 68  | Bladder        | High grade UC                                  | T2              |                   | Pelvic node      |
| 65         | Male   | 64  | Bladder        | High grade UC                                  | T2              |                   | Seminal vesicle  |
| 81         | Male   | 63  | Bladder        | High grade UC                                  | T1              |                   | Pelvic node      |
| 82         | Male   | 73  | Bladder        | High grade UC                                  | T2              |                   | Pelvic node      |
| 95         | Male   | 63  | Bladder        | High grade UC                                  | T2              |                   | Pelvic node      |
| 104        | Female | 64  | Bladder        | High grade UC                                  | T1              |                   | Pelvic node      |
| 110        | Male   | 57  | Bladder        | High grade UC                                  | T1              |                   | Pelvic node      |
| 116        | Male   | 59  | Bladder        | UC carcinoma in situ                           | Tis             |                   | Pelvic node      |
| 121        | Female | 82  | Bladder        | High grade UC                                  | T2              |                   | Pelvic node      |
| 181        | Male   | 56  | Bladder        | High grade UC                                  | T2              |                   | Pelvic node      |
| 182        | Male   | 72  | Bladder        | High grade UC                                  | T4              |                   | Seminal vesicle  |
| 216        | Male   | 68  | Ureter         | High grade UC                                  | T3              |                   | Perinephric node |
| 239        | Male   | 55  | Ureter         | High grade UC                                  | T3              |                   | Renal parenchyma |
| 64         | Male   | 71  |                |                                                |                 | Lung              | Lung             |
| 150        | Male   | 66  |                |                                                |                 | Peritoneum        | Pelvic node      |
| 159        | Female | 51  |                |                                                |                 | Lung              |                  |
| 176        | Female | 60  |                |                                                |                 | Perineum          |                  |
| 187        | Male   | 71  |                |                                                |                 | Peritoneum        | Abdominal node   |
| 188        | Male   | 68  |                |                                                |                 | Pelvic node       | Prostate         |
| 195        | Female | 69  |                |                                                |                 | Pelvic node       |                  |
| 198        | Male   | 73  |                |                                                |                 | Peritoneum        |                  |
| 203        | Female | 64  |                |                                                |                 | Lung              |                  |
| 207        | Male   | 52  |                |                                                |                 | Peritoneum        |                  |
| 211        | Female | 45  |                |                                                |                 | Brain             |                  |
| 215        | Female | 51  |                |                                                |                 | Brain             | Pelvic node      |
| 218        | Female | 50  |                |                                                |                 | Pericardium       |                  |
| 219        | Male   | 64  |                |                                                |                 | Abdominal node    |                  |
| 222        | Male   | 57  |                |                                                |                 | Lung              | Lung             |
| 227        | Female | 55  |                |                                                |                 | Peritoneum        | Pelvic node      |
| 250        | Female | 60  |                |                                                |                 | Lung              | Lung             |
| 255        | Male   | 81  |                |                                                |                 | Lung              | Lung             |
