# Supplementary material for: DNA copy number analysis of metastatic urothelial carcinoma with comparison to primary tumors
Source: PubMed Central journal article supplement (PMC4392457; doi:10.1186/s12885-015-1192-2), 2015-04-09

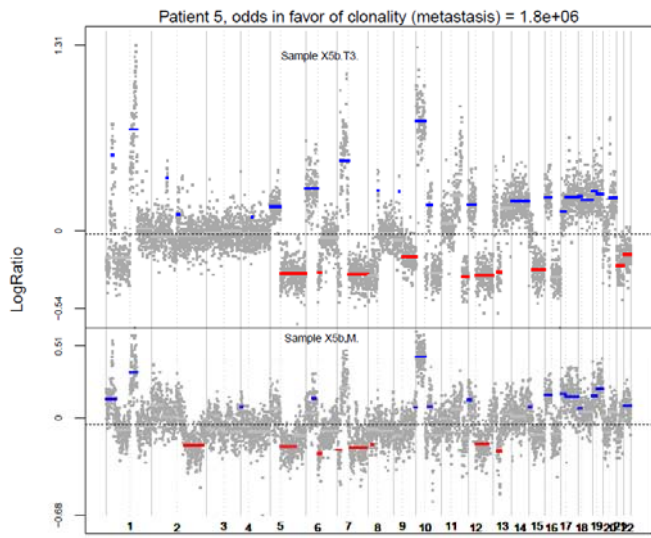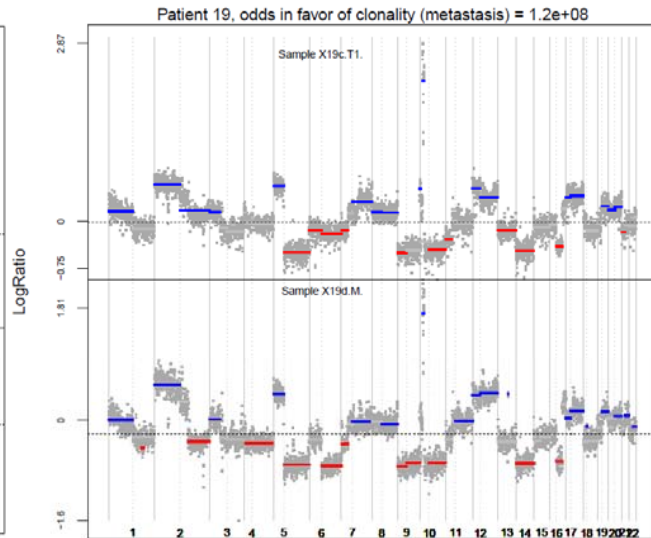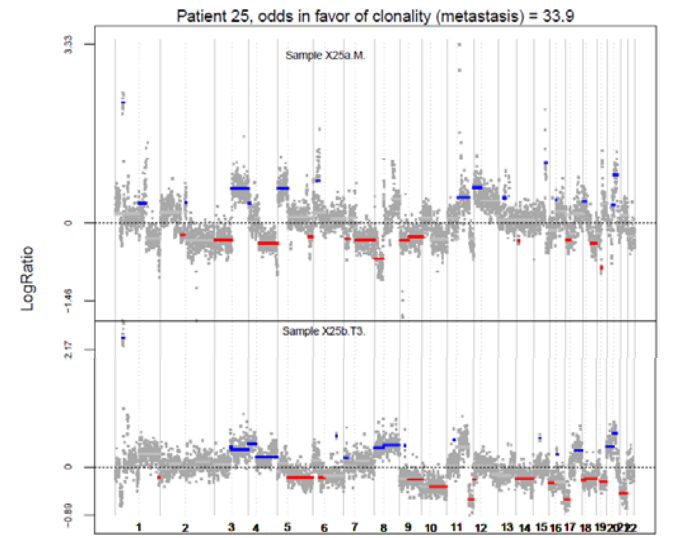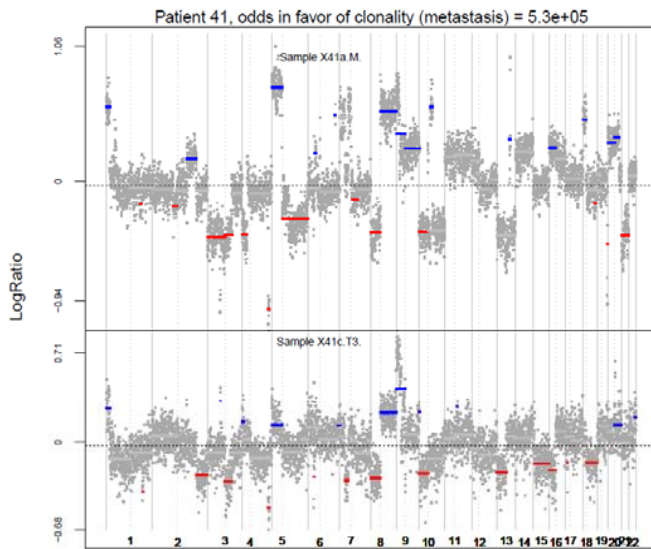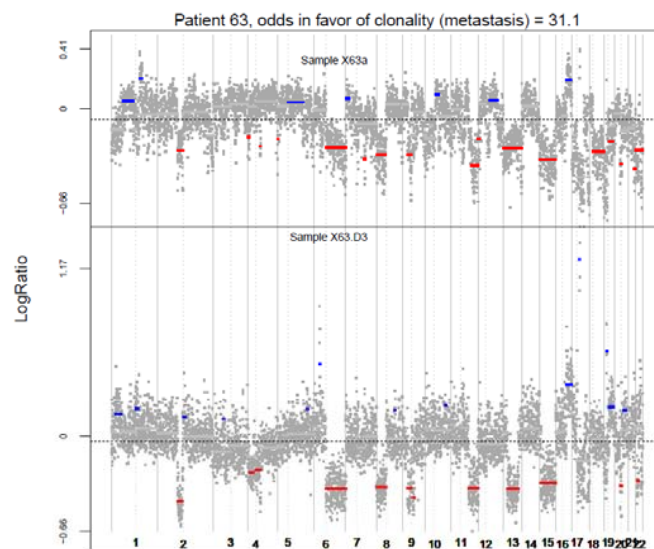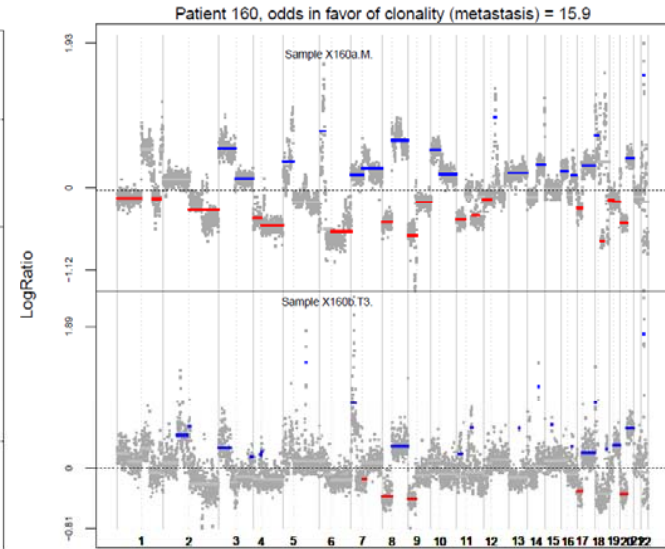

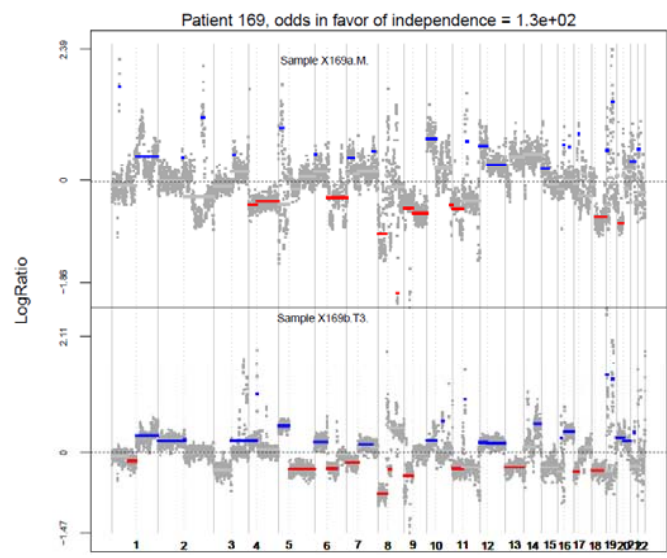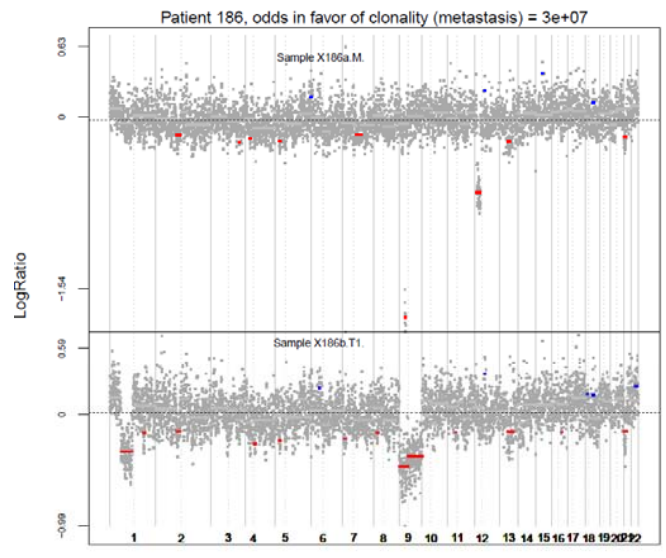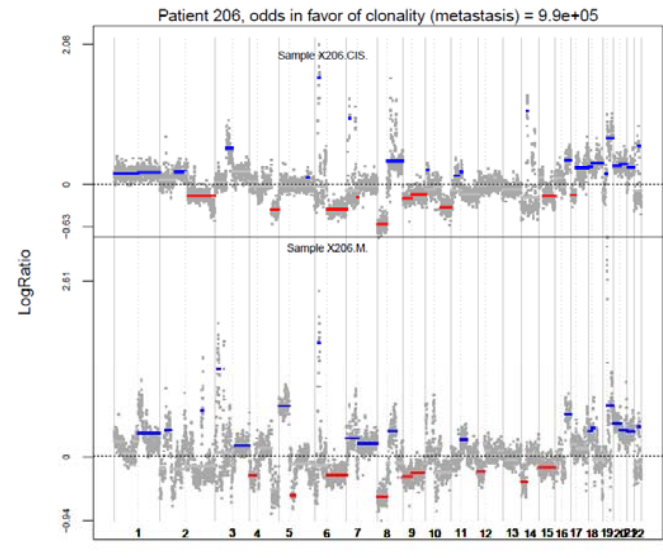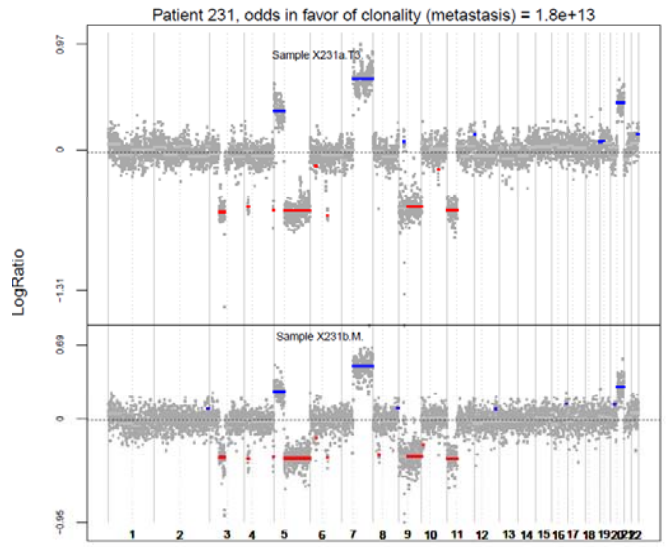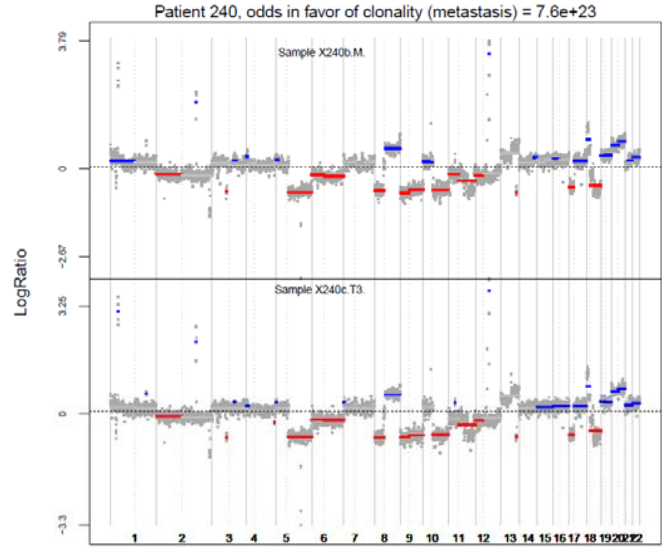

Supplement: 12885_2015_1192_MOESM5_ESM.pdf [file 12885_2015_1192_MOESM5_ESM.pdf]
